# Supplementary material for: Improving the performance of β-turn prediction using predicted shape strings and a two-layer support vector machine model
Source: Springer Nature journal article supplement (doi:10.1186/1471-2105-12-283), 2011-07-13
Supplement: 12859_2010_4710_MOESM1_ESM.pdf [file 12859_2010_4710_MOESM1_ESM.pdf]

Query entry

```
graph TD; A[Query entry] --> B[Search homologous in reduced dataset using PSI-Blast program according to e-value]; B --> C[Assign the shape strings of hit entries to the target sequence]; C --> D[Output the shape string];
```

Search homologous in reduced dataset using PSI-Blast program according to *e-value*

Assign the shape strings of hit entries to the target sequence

Output the shape string
