# Supplementary material for: Improving the performance of β-turn prediction using predicted shape strings and a two-layer support vector machine model
Source: Springer Nature journal article supplement (doi:10.1186/1471-2105-12-283), 2011-07-13

# ROC

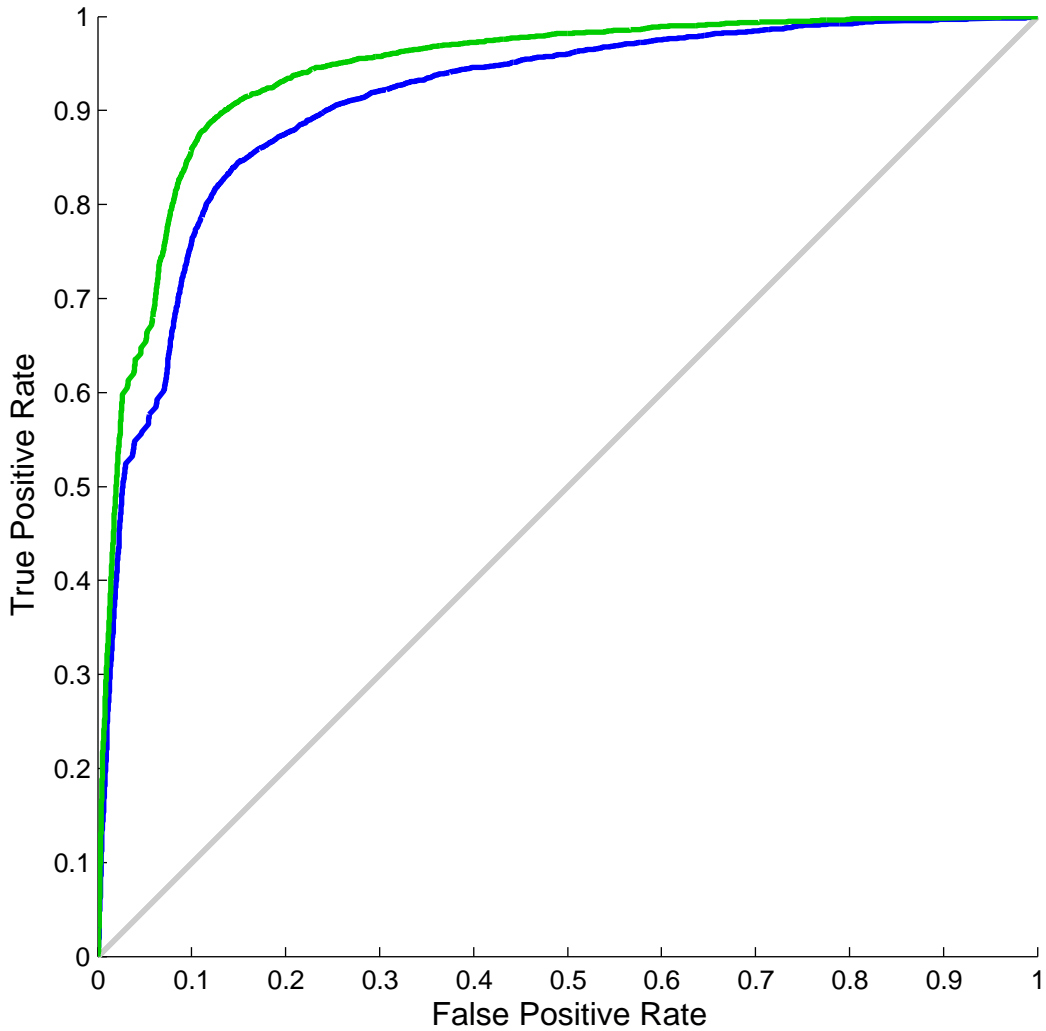

Supplement: 12859_2010_4710_MOESM7_ESM.pdf [file 12859_2010_4710_MOESM7_ESM.pdf]
